# Supplementary material
Source: PubMed Central journal article supplement (PMC8791784)
Supplement: NIHMS1770898-supplement-1.pdf [file NIHMS1770898-supplement-1.pdf]

---

**Supplementary information**

---

**Clinical and therapeutic relevance of  
cancer-associated fibroblasts**

---

In the format provided by the  
authors and unedited

**Supplementary Table 1 | Widely used biomarkers of CAFs and their clinical relevance**

| Gene          | Marker                              | CAF subset                                                    | Expression in other cell types                                                                                                 | Cellular location        | Prognostic value based on HPA-TCGA <sup>a</sup> |                                                          |
|---------------|-------------------------------------|---------------------------------------------------------------|--------------------------------------------------------------------------------------------------------------------------------|--------------------------|-------------------------------------------------|----------------------------------------------------------|
|               |                                     |                                                               |                                                                                                                                |                          | Unfavourable                                    | Favourable                                               |
| <i>ACTA2</i>  | $\alpha$ SMA <sup>1-9</sup>         | Peritumoural myofibroblasts                                   | Pericytes, smooth muscle cells and breast myoepithelial cells                                                                  | Intracellular            | Renal cancer                                    | –                                                        |
| <i>FAP</i>    | FAP <sup>8-15</sup>                 | A subset of myofibroblasts                                    | Pericytes, smooth muscle cells, myocytes and glandular cells                                                                   | Membrane and secreted    | Head and neck cancer                            | –                                                        |
| <i>S100A4</i> | S100A4 (FSP1) <sup>9,16-18</sup>    | Interstitial CAFs (apCAF and some iCAF)                       | Myeloid cells, some (EMT) cancer cells, haematopoietic cells, pneumocytes and urothelial cells                                 | Membrane                 | Renal cancer                                    | Head and neck cancer                                     |
| <i>TAGLN</i>  | Transgelin <sup>5-7,19</sup>        | Myofibroblasts                                                | Pericytes, smooth muscle cells and breast myoepithelial cells                                                                  | Intracellular            | Renal cancer                                    | –                                                        |
| <i>THY1</i>   | Thy1/CD90 <sup>5,20,21</sup>        | Myofibroblasts                                                | T cells and neurons                                                                                                            | Membrane and nucleoplasm | Renal cancer and glioma                         | –                                                        |
| <i>LRRC15</i> | LRRC15 <sup>10,22,23</sup>          | A subset of myofibroblasts                                    | Glandular cells, smooth muscle cells and myocytes                                                                              | Membrane                 | –                                               | –                                                        |
| <i>TNC</i>    | Tenascin C <sup>5,24-27</sup>       | Myofibroblasts                                                | Pericytes and cancer cells                                                                                                     | Secreted                 | –                                               | –                                                        |
| <i>PDGFRB</i> | PDGFR $\beta$ <sup>5,9,28,29</sup>  | Myofibroblasts and some $\alpha$ SMA-low CAFs                 | Pericytes and neurons                                                                                                          | Membrane                 | Renal cancer and urothelial cancer              | –                                                        |
| <i>PDGFRA</i> | PDGFR $\alpha$ <sup>5,6,28-33</sup> | $\alpha$ SMA-low CAFs and some $\alpha$ SMA <sup>+</sup> CAFs | Breast myoepithelial cells                                                                                                     | Membrane                 | Renal cancer                                    | Head and neck cancer                                     |
| <i>CAV1</i>   | Caveolin-1 <sup>34-36</sup>         | $\alpha$ SMA-low CAFs                                         | Endothelial cells, some cancer cells, pericytes, pneumocytes, squamous epithelial cells, smooth muscle cells and myocytes      | Membrane                 | Renal cancer and lung cancer                    | –                                                        |
| <i>CLEC3B</i> | CLEC3B <sup>5,37-39</sup>           | $\alpha$ SMA-low CAFs                                         | Renal tubule epithelial cells                                                                                                  | Secreted                 | –                                               | Pancreatic cancer, head and neck cancer and liver cancer |
| <i>VIM</i>    | Vimentin <sup>40,41</sup>           | Pan-CAF biomarker                                             | Some (EMT) cancer cells, endothelial cells, pneumocytes, glandular cells, adipocytes, and haematopoietic and/or lymphoid cells | Intracellular            | Renal cancer                                    | Endometrial cancer                                       |
| <i>PDPN</i>   | Podoplanin <sup>5,8,17,42,43</sup>  | Pan-CAF biomarker                                             | Lymphatic endothelial cells, some myeloid cells, pneumocytes and breast myoepithelial cells                                    | Membrane                 | –                                               | –                                                        |
| <i>DES</i>    | Desmin <sup>44,45</sup>             | Pan-CAF biomarker, especially myofibroblasts                  | Pericytes, smooth muscle cells and myocytes                                                                                    | Intracellular            | Renal cancer                                    | –                                                        |
| <i>DCN</i>    | Decorin <sup>46</sup>               | Pan-CAF biomarker                                             | Some epithelial and cancer cells and adipocytes                                                                                | Secreted                 | Renal cancer                                    | –                                                        |
| <i>DDR2</i>   | DDR2 <sup>47,48</sup>               | Pan-CAF biomarker                                             | Pericytes, smooth muscle cells and some cancer cells                                                                           | Membrane                 | Renal cancer                                    | –                                                        |
| <i>LOX</i>    | LOX <sup>49</sup>                   | Pan-CAF biomarker                                             | Some cancer cells                                                                                                              | Secreted                 | Liver cancer, renal cancer, urothelial cancer   | –                                                        |

|               |                                   |                   |                                                                                    |                          |                                                                          |   |
|---------------|-----------------------------------|-------------------|------------------------------------------------------------------------------------|--------------------------|--------------------------------------------------------------------------|---|
| <i>LOXL1</i>  | LOXL1                             | Pan-CAF biomarker | Pericytes and cancer cells                                                         | Secreted                 | Glioma                                                                   | – |
| <i>LOXL2</i>  | LOXL2 <sup>50</sup>               | Pan-CAF biomarker | Pericytes and cancer cells                                                         | Secreted                 | Lung cancer, renal cancer, cervical cancer, glioma and pancreatic cancer | – |
| <i>MFAP5</i>  | MFAP5 <sup>7,51,52</sup>          | Pan-CAF biomarker | Smooth muscle cells                                                                | Secreted                 | Stomach cancer and urothelial cancer                                     | – |
| <i>MMP2</i>   | MMP2 <sup>7</sup>                 | Pan-CAF biomarker | Some cancer cells and endothelial cells                                            | Secreted                 | –                                                                        | – |
| <i>POSTN</i>  | Periostin <sup>53</sup>           | Pan-CAF biomarker | Pericytes, neurons, glial cells, respiratory epithelial cells and glandular cells  | Secreted and nucleoplasm | Renal cancer, lung cancer, stomach cancer                                | – |
| <i>COL3A1</i> | COL3A1 <sup>5</sup>               | Pan-CAF biomarker | Pericytes                                                                          | Secreted                 | Renal cancer                                                             | – |
| <i>SPARC</i>  | SPARC (osteonectin) <sup>54</sup> | Pan-CAF biomarker | Endothelial cells, cancer cells, haematopoietic cells and glandular cells          | Secreted                 | Renal cancer                                                             | – |
| <i>FGFR1</i>  | FGFR1                             | Pan-CAF biomarker | Endothelial cells, cancer cells, glandular cells, smooth muscle cells and myocytes | Membrane                 | –                                                                        | – |

apCAFs, antigen-presenting cancer-associated fibroblasts; cancer-associated fibroblast; CAF, cancer-associated fibroblast; EMT, epithelial-to-mesenchymal transition; iCAFs, inflammatory cancer-associated fibroblasts. <sup>a</sup>The prognostic values of indicated CAF biomarkers are based on the analyses by the Human Protein Atlas (HPA) based on the datasets from The Cancer Genome Atlas (TCGA) programme. A prognostic gene was defined with a log rank  $P < 0.001$  in maximally separated Kaplan–Meier analysis (based on the RNA-sequencing fragments per kilobase million (FPKM) value of a given gene). Patients were classified into two expression groups and analyzed for the correlation between gene-expression level and survival.

**Supplementary Table 2 | Therapeutic strategies targeting CAFs in cancers and related clinical trials**

| Agent                              | Target                 | Therapeutic category                                | Mechanism of action                                                                          | Development status                                                                                                | Clinical trials                                                                                           |
|------------------------------------|------------------------|-----------------------------------------------------|----------------------------------------------------------------------------------------------|-------------------------------------------------------------------------------------------------------------------|-----------------------------------------------------------------------------------------------------------|
| PEGPH20                            | Hyaluronic acid        | PEGylated enzyme                                    | Enzymatic degradation of excessive stromal hyaluronan <sup>55</sup>                          | Phase III trials halted in Nov 2019                                                                               | NCT02241187 and NCT03634332                                                                               |
| Pamrevlumab (FG-3019)              | CTGF                   | Human monoclonal antibody                           | Antagonizes the action of CTGF <sup>56</sup>                                                 | Phase III trials                                                                                                  | NCT01181245, NCT02210559 and NCT03941093                                                                  |
| Simtuzumab (GS-6624)               | LOXL2                  | Humanized monoclonal antibody                       | Blocks fibroblast recruitment and collagen cross-linking functions of LOXL2 <sup>57</sup>    | Phase II trial for pancreatic cancer completed in 2014. Phase II trials for IPF and colorectal cancer terminated. | NCT01472198, NCT01769196, NCT01479465 and NCT02466516                                                     |
| Olaratumab                         | PDGFR $\alpha$         | Human monoclonal antibody                           | Antagonizes PDGFR $\alpha$ signaling <sup>58</sup>                                           | Phase I and II trials                                                                                             | NCT03086369, NCT03994627, NCT03802071 and NCT03985722                                                     |
| Cabiralizumab (BMS-986227, FPA008) | CSF1R                  | Humanized monoclonal antibody                       | Inhibits CSF1R signalling; functional suppression of monocytes and macrophages <sup>59</sup> | Phase I and II trials                                                                                             | NCT03599362, NCT03336216, NCT04050462, NCT03502330 and NCT04331067                                        |
| Istiratumab (MM-141)               | IGF1R and HER3 (ErbB3) | Human tetravalent bispecific antibody               | Blockade of the IGF-1R and HER3 (ErbB3) pathways in pancreatic cancer cells <sup>60</sup>    | Phase I trial terminated                                                                                          | NCT02538627                                                                                               |
| Xentuzumab (BI 836845) or MEDI-573 | IGF1 and IGF2          | Humanized monoclonal antibody                       | Inhibits IGF1-stimulated and IGF2-stimulated activation of IGFs <sup>61</sup>                | Phase I and II trials                                                                                             | NCT02191891, NCT02204072, NCT02123823, NCT01446159 and NCT00816361                                        |
| CAR T cell product                 | FAP                    | CAR T cells targeting FAP                           | Depletion of FAP-expressing CAFs and immune modulation <sup>62-64</sup>                      | Preclinical studies                                                                                               | NA                                                                                                        |
| <sup>131</sup> I-sibrotuzumab      | FAP                    | Radioactive isotope-conjugated antibody             | <sup>131</sup> I-labeled FAP-targeting antibody uptake in FAP-positive tumors <sup>65</sup>  | Phase I trial for lung cancer terminated                                                                          | NCT02209727                                                                                               |
| RO6874281 (FAP-IL2v, RG7461)       | FAP                    | Antibody moiety linked to cytokine (immunocytokine) | Binding to FAP and targeting IL-2 (IL-2v) to FAP-expressing cells/tumours <sup>66</sup>      | Phase I–II for multiple cancer types                                                                              | NCT03875079, NCT02627274, NCT03386721 and NCT03193190                                                     |
| ATRA                               | Vitamin A metabolism   | Metabolite                                          | CAF normalization and restrained tumour growth <sup>67,68</sup>                              | Phase I–II trials for multiple cancer types                                                                       | NCT03307148, NCT04113863, NCT04241276, NCT03999684, NCT03200847, NCT03572387 and NCT04433169              |
| Paricalcitol (vitamin D analogue)  | Vitamin D receptor     | Small-molecule agonist                              | CAF normalization and improved chemotherapeutic efficacy <sup>69</sup>                       | Phase I–II for multiple cancer types                                                                              | NCT03883919, NCT03415854, NCT03520790, NCT04054362, NCT02930902, NCT03519308, NCT02754726 and NCT03138720 |

|                                       |                        |                           |                                                                                                                             |                                                                                                                                                                         |                                                                                                                                     |
|---------------------------------------|------------------------|---------------------------|-----------------------------------------------------------------------------------------------------------------------------|-------------------------------------------------------------------------------------------------------------------------------------------------------------------------|-------------------------------------------------------------------------------------------------------------------------------------|
| Fresolimumab (GC1008)                 | TGFβ                   | Human monoclonal antibody | Blocks TGFβ signalling <sup>70</sup>                                                                                        | Phase I/II trial for lung cancer                                                                                                                                        | NCT02581787                                                                                                                         |
| Galunisertib (LY2157299)              | TGFβ receptor I kinase | Small-molecule inhibitor  | Blocking TGFβ signaling and CAF activation <sup>71</sup>                                                                    | Phase I–II for multiple cancer types                                                                                                                                    | NCT01373164, NCT02688712, NCT02452008, NCT04031872, NCT03206177 and NCT02672475                                                     |
| Vismodegib (GDC-0449)                 | Hedgehog               | Small-molecule inhibitor  | Inhibition of HH–SMO signalling and tumour growth inhibition. Potential deactivation of CAFs <sup>72</sup>                  | Approved for basal-cell carcinoma (phase IV studies ongoing). Phase I–II trials for multiple cancer types.                                                              | NCT03610022, NCT02667574, NCT03052478, NCT02371967 and NCT00878163                                                                  |
| LDE225 (Sonidegib)                    | Hedgehog               | Small-molecule inhibitor  | Inhibition of SMO and HH signalling pathway <sup>73</sup>                                                                   | Approved for basal-cell carcinoma. Phase I for multiple cancer types                                                                                                    | NCT04007744                                                                                                                         |
| Saridegib or patidegib (IPI-926)      | Hedgehog               | Small-molecule inhibitor  | Inhibition of HH–SMO signalling, stromal depletion and facilitated drug delivery <sup>74</sup>                              | Phase II trials for basal cell carcinoma, phase III for basal cell nevus syndrome (as patidegib); phase I–II trials for multiple cancer types (as IPI-926 or saridegib) | NCT01130142, NCT04155190, NCT04308395, NCT00761696, NCT01383538 and NCT01310816                                                     |
| TP-0903                               | AXL                    | Small-molecule inhibitor  | Inhibition of AXL on cancer cells, CAFs, and myeloid cells <sup>75</sup>                                                    | Phase I trial for solid tumours                                                                                                                                         | NCT02729298                                                                                                                         |
| Plerixafor (AMD3100)                  | CXCR4                  | Small-molecule inhibitor  | Blocks CXCL12(SDF1)–CXCR4 interaction and immune modulation <sup>11</sup>                                                   | Phase II–III trials for multiple cancer types                                                                                                                           | NCT03277209, NCT04177810, NCT04058145, NCT03746080 and NCT00103662                                                                  |
| BL-8040                               | CXCR4                  | Small-molecule inhibitor  | CXCL12–CXCR4 inhibition and immune regulation <sup>76</sup>                                                                 | Phase II–III trials for multiple cancer types                                                                                                                           | NCT02826486, NCT04543071 and NCT02907099                                                                                            |
| Defactinib (VS-6063, PF-04554878)     | FAK                    | Small-molecule inhibitor  | Restrains tumour growth through FAK inhibition <sup>77</sup>                                                                | Phase I–II trials for multiple cancer types                                                                                                                             | NCT04201145, NCT03875820, NCT02758587, NCT03727880, NCT03287271, NCT04331041 and NCT04439331                                        |
| Erdafitinib (JNJ-42756493)            | FGFR1–4                | Small-molecule inhibitor  | Inhibits FGFRs expressed by cancer cells and antagonizing the signalling induced by FGF released from CAFs <sup>78,79</sup> | Approved for urothelial and bladder cancer. Phase I–III trials for multiple cancer types                                                                                | NCT04083976, NCT03473743, NCT02699606, NCT02952573, NCT04172675, NCT04330248, NCT03238196, NCT03210714, NCT03390504 and NCT03999515 |
| BGJ398, Debio-1347, AZD4547 or TAS120 | FGFR1–3                | Small-molecule inhibitors | Inhibit tumour growth. Induction of CAF senescence or inactivation <sup>80</sup>                                            | Phase I–III trial for multiple cancer types                                                                                                                             | NCT02150967, NCT03773302, NCT04197986, NCT04228042, NCT04233567,                                                                    |

|                           |                              |                                                          |                                                                                                 |                                                                                           |                                                       |
|---------------------------|------------------------------|----------------------------------------------------------|-------------------------------------------------------------------------------------------------|-------------------------------------------------------------------------------------------|-------------------------------------------------------|
|                           |                              |                                                          |                                                                                                 |                                                                                           | NCT03344536, NCT01824901 and NCT04024436              |
| AT13148                   | AGC kinases (ROCK, AKT, PKA) | ATP-competitive small-molecule inhibitor                 | Inhibition of PI3K-AKT pathway signaling through AGC kinases <sup>81</sup>                      | Phase I trial for advanced-stage solid tumours                                            | NCT01585701                                           |
| Imatinib                  | PDGFR, BCR-ABL1 and KIT      | Tyrosine kinase inhibitor                                | Inhibits tumour growth and angiogenesis. PDGFR inhibition in CAFs and pericytes <sup>82</sup>   | Approved for CML, ALL and gastrointestinal stromal tumour                                 | NA                                                    |
| Dasatinib                 | SRC and ABL1                 | ATP-competitive tyrosine kinase inhibitor                | Inhibits cancer cells and CAFs <sup>83</sup>                                                    | Approved for CML and ALL                                                                  | NA                                                    |
| PF-04136309               | CCR2                         | Antagonist                                               | Blocks CCL2-CCR2 signalling                                                                     | Phase I/II trial for pancreatic cancer terminated                                         | NCT02732938                                           |
| Siltuximab or tocilizumab | IL-6 and IL-6R, respectively | Chimeric and humanized monoclonal antibody, respectively | Block IL-6-IL-6R signalling <sup>84</sup>                                                       | Approved for Castleman disease and arthritis. Phase I-II trials for multiple cancer types | NCT04191421 and NCT04375228                           |
| Danvatirsen (AZD9150)     | STAT3                        | Antisense oligonucleotide                                | Inhibits STAT3 signalling <sup>85</sup>                                                         | Phase II trial for multiple cancer types                                                  | NCT02983578                                           |
| Andecaliximab (GS-5745)   | MMP9                         | Recombinant chimeric IgG4 monoclonal antibody            | Inhibits MMP9 <sup>86</sup>                                                                     | Phase I/II/III for multiple cancer types                                                  | NCT02545504, NCT03631836, NCT01803282 and NCT02864381 |
| S-3304                    | MMPs                         | Small-molecule inhibitor                                 | Inhibits MMPs and ECM degradation <sup>87</sup>                                                 | Phase I-II trials                                                                         | NCT00033566, NCT00078390 and NCT00033215              |
| <sup>131</sup> I-m81C6    | Tenascin                     | Radioactive isotope-conjugated antibody                  | <sup>131</sup> I-labelled tenascin-targeting antibody for distribution to tumours <sup>88</sup> | Phase I-II trials                                                                         | NCT00002752 and NCT00003478                           |

ALL, acute lymphocytic leukaemia; ATRA, all-trans retinoic acid; CAF, cancer-associated fibroblast; CAR, chimeric antigen receptor; CML, chronic myeloid leukaemia; ECM, extracellular matrix; MMPs, matrix metalloproteinases; NA, not applicable.

## Supplementary references

- 1 Ronnov-Jessen, L. & Petersen, O. W. Induction of alpha-smooth muscle actin by transforming growth factor-beta 1 in quiescent human breast gland fibroblasts. Implications for myofibroblast generation in breast neoplasia. *Lab Invest* **68**, 696-707 (1993).
- 2 Ozdemir, B. C. *et al.* Depletion of carcinoma-associated fibroblasts and fibrosis induces immunosuppression and accelerates pancreas cancer with reduced survival. *Cancer Cell* **25**, 719-734, doi:10.1016/j.ccr.2014.04.005 (2014).
- 3 Ohlund, D. *et al.* Distinct populations of inflammatory fibroblasts and myofibroblasts in pancreatic cancer. *J Exp Med* **214**, 579-596, doi:10.1084/jem.20162024 (2017).
- 4 Biffi, G. *et al.* IL1-Induced JAK/STAT Signaling Is Antagonized by TGFbeta to Shape CAF Heterogeneity in Pancreatic Ductal Adenocarcinoma. *Cancer Discov* **9**, 282-301, doi:10.1158/2159-8290.CD-18-0710 (2019).
- 5 Elyada, E. *et al.* Cross-Species Single-Cell Analysis of Pancreatic Ductal Adenocarcinoma Reveals Antigen-Presenting Cancer-Associated Fibroblasts. *Cancer Discov* **9**, 1102-1123, doi:10.1158/2159-8290.CD-19-0094 (2019).
- 6 Hoseini, A. N. *et al.* Cellular heterogeneity during mouse pancreatic ductal adenocarcinoma progression at single-cell resolution. *JCI insight* **5**, doi:10.1172/jci.insight.129212 (2019).
- 7 Li, H. *et al.* Reference component analysis of single-cell transcriptomes elucidates cellular heterogeneity in human colorectal tumors. *Nature genetics* **49**, 708-718, doi:10.1038/ng.3818 (2017).
- 8 Puram, S. V. *et al.* Single-Cell Transcriptomic Analysis of Primary and Metastatic Tumor Ecosystems in Head and Neck Cancer. *Cell* **171**, 1611-1624 e1624, doi:10.1016/j.cell.2017.10.044 (2017).
- 9 Costa, A. *et al.* Fibroblast Heterogeneity and Immunosuppressive Environment in Human Breast Cancer. *Cancer Cell* **33**, 463-479 e410, doi:10.1016/j.ccell.2018.01.011 (2018).
- 10 Kieffer, Y. *et al.* Single-Cell Analysis Reveals Fibroblast Clusters Linked to Immunotherapy Resistance in Cancer. *Cancer Discov*, doi:10.1158/2159-8290.CD-19-1384 (2020).
- 11 Feig, C. *et al.* Targeting CXCL12 from FAP-expressing carcinoma-associated fibroblasts synergizes with anti-PD-L1 immunotherapy in pancreatic cancer. *Proceedings of the National Academy of Sciences of the United States of America* **110**, 20212-20217, doi:10.1073/pnas.1320318110 (2013).
- 12 Ohlund, D., Elyada, E. & Tuveson, D. Fibroblast heterogeneity in the cancer wound. *J Exp Med* **211**, 1503-1523, doi:10.1084/jem.20140692 (2014).
- 13 Kraman, M. *et al.* Suppression of antitumor immunity by stromal cells expressing fibroblast activation protein-alpha. *Science* **330**, 827-830, doi:10.1126/science.1195300 (2010).
- 14 Henry, L. R. *et al.* Clinical implications of fibroblast activation protein in patients with colon cancer. *Clinical cancer research : an official journal of the American Association for Cancer Research* **13**, 1736-1741, doi:10.1158/1078-0432.CCR-06-1746 (2007).
- 15 Ariga, N., Sato, E., Ohuchi, N., Nagura, H. & Ohtani, H. Stromal expression of fibroblast activation protein/seprase, a cell membrane serine proteinase and gelatinase, is associated with longer survival in patients with invasive ductal carcinoma of breast. *International journal of cancer* **95**, 67-72, doi:10.1002/1097-0215(20010120)95:1<67::aid-ijc1012>3.0.co;2-u (2001).
- 16 Strutz, F. *et al.* Identification and characterization of a fibroblast marker: FSP1. *J Cell Biol* **130**, 393-405 (1995).
- 17 Friedman, G. *et al.* Cancer-associated fibroblast compositions change with breast cancer progression linking the ratio of S100A4+ and PDPN+ CAFs to clinical outcome. *Nature Cancer* **1**, 692-708, doi:10.1038/s43018-020-0082-y (2020).
- 18 Mills, L. D. *et al.* Loss of the transcription factor GLI1 identifies a signaling network in the tumor microenvironment mediating KRAS oncogene-induced transformation. *The Journal of biological chemistry* **288**, 11786-11794, doi:10.1074/jbc.M112.438846 (2013).
- 19 Yu, B. *et al.* Stromal fibroblasts in the microenvironment of gastric carcinomas promote tumor metastasis via upregulating TAGLN expression. *BMC Cell Biol* **14**, 17, doi:10.1186/1471-2121-14-17 (2013).
- 20 True, L. D. *et al.* CD90/THY1 is overexpressed in prostate cancer-associated fibroblasts and could serve as a cancer biomarker. *Mod Pathol* **23**, 1346-1356, doi:10.1038/modpathol.2010.122 (2010).
- 21 Schliekelman, M. J. *et al.* Thy-1(+) Cancer-associated Fibroblasts Adversely Impact Lung Cancer Prognosis. *Sci Rep* **7**, 6478, doi:10.1038/s41598-017-06922-5 (2017).
- 22 Dominguez, C. X. *et al.* Single-Cell RNA Sequencing Reveals Stromal Evolution into LRRC15(+) Myofibroblasts as a Determinant of Patient Response to Cancer Immunotherapy. *Cancer Discov* **10**, 232-253, doi:10.1158/2159-8290.CD-19-0644 (2020).
- 23 Purcell, J. W. *et al.* LRRC15 Is a Novel Mesenchymal Protein and Stromal Target for Antibody-Drug Conjugates. *Cancer research* **78**, 4059-4072, doi:10.1158/0008-5472.CAN-18-0327 (2018).
- 24 Barrera, L. N. *et al.* Fibroblasts from Distinct Pancreatic Pathologies Exhibit Disease-Specific Properties. *Cancer research* **80**, 2861-2873, doi:10.1158/0008-5472.CAN-19-3534 (2020).
- 25 O'Connell, J. T. *et al.* VEGF-A and Tenascin-C produced by S100A4+ stromal cells are important for metastatic colonization. *Proc Natl Acad Sci U S A* **108**, 16002-16007, doi:10.1073/pnas.1109493108 (2011).

- 26 De Wever, O. *et al.* Tenascin-C and SF/HGF produced by myofibroblasts in vitro provide convergent pro-invasive signals to human colon cancer cells through RhoA and Rac. *FASEB J* **18**, 1016-1018, doi:10.1096/fj.03-1110fje (2004).
- 27 Gocheva, V. *et al.* Quantitative proteomics identify Tenascin-C as a promoter of lung cancer progression and contributor to a signature prognostic of patient survival. *Proceedings of the National Academy of Sciences of the United States of America* **114**, E5625-E5634, doi:10.1073/pnas.1707054114 (2017).
- 28 Bartoschek, M. *et al.* Spatially and functionally distinct subclasses of breast cancer-associated fibroblasts revealed by single cell RNA sequencing. *Nature communications* **9**, 5150, doi:10.1038/s41467-018-07582-3 (2018).
- 29 Frings, O. *et al.* Prognostic significance in breast cancer of a gene signature capturing stromal PDGF signaling. *Am J Pathol* **182**, 2037-2047, doi:10.1016/j.ajpath.2013.02.018 (2013).
- 30 Chen, Z. *et al.* Single-cell RNA sequencing highlights the role of inflammatory cancer-associated fibroblasts in bladder urothelial carcinoma. *Nature communications* **11**, 5077, doi:10.1038/s41467-020-18916-5 (2020).
- 31 Kilvaer, T. K. *et al.* Differential prognostic impact of platelet-derived growth factor receptor expression in NSCLC. *Sci Rep* **9**, 10163, doi:10.1038/s41598-019-46510-3 (2019).
- 32 Erez, N., Truitt, M., Olson, P., Arron, S. T. & Hanahan, D. Cancer-Associated Fibroblasts Are Activated in Incipient Neoplasia to Orchestrate Tumor-Promoting Inflammation in an NF-kappaB-Dependent Manner. *Cancer Cell* **17**, 135-147, doi:10.1016/j.ccr.2009.12.041 (2010).
- 33 Raz, Y. *et al.* Bone marrow-derived fibroblasts are a functionally distinct stromal cell population in breast cancer. *The Journal of experimental medicine* **215**, 3075-3093, doi:10.1084/jem.20180818 (2018).
- 34 Goetz, J. G. *et al.* Biomechanical remodeling of the microenvironment by stromal caveolin-1 favors tumor invasion and metastasis. *Cell* **146**, 148-163, doi:10.1016/j.cell.2011.05.040 (2011).
- 35 Sloan, E. K. *et al.* Stromal cell expression of caveolin-1 predicts outcome in breast cancer. *The American journal of pathology* **174**, 2035-2043, doi:10.2353/ajpath.2009.080924 (2009).
- 36 Witkiewicz, A. K. *et al.* An absence of stromal caveolin-1 expression predicts early tumor recurrence and poor clinical outcome in human breast cancers. *The American journal of pathology* **174**, 2023-2034, doi:10.2353/ajpath.2009.080873 (2009).
- 37 Zhu, H. F. *et al.* Cancer-associated fibroblasts promote colorectal cancer progression by secreting CLEC3B. *Cancer biology & therapy* **20**, 967-978, doi:10.1080/15384047.2019.1591122 (2019).
- 38 Chen, H. *et al.* High Intratumoral Expression of Tetranectin Associates with Poor Prognosis of Patients with Gastric Cancer after Gastrectomy. *Journal of Cancer* **8**, 3623-3630, doi:10.7150/jca.19438 (2017).
- 39 Sun, J. *et al.* CLEC3B as a potential diagnostic and prognostic biomarker in lung cancer and association with the immune microenvironment. *Cancer Cell Int* **20**, 106, doi:10.1186/s12935-020-01183-1 (2020).
- 40 Maehira, H. *et al.* Vimentin Expression in Tumor Microenvironment Predicts Survival in Pancreatic Ductal Adenocarcinoma: Heterogeneity in Fibroblast Population. *Annals of surgical oncology* **26**, 4791-4804, doi:10.1245/s10434-019-07891-x (2019).
- 41 Yao, J. X. *et al.* Prognostic Value of Vimentin Is Associated With Immunosuppression in Metastatic Renal Cell Carcinoma. *Front Oncol* **10**, 1181, doi:10.3389/fonc.2020.01181 (2020).
- 42 Hoshino, A. *et al.* Podoplanin-positive fibroblasts enhance lung adenocarcinoma tumor formation: podoplanin in fibroblast functions for tumor progression. *Cancer research* **71**, 4769-4779, doi:10.1158/0008-5472.CAN-10-3228 (2011).
- 43 Neri, S. *et al.* Podoplanin-expressing cancer-associated fibroblasts lead and enhance the local invasion of cancer cells in lung adenocarcinoma. *International journal of cancer* **137**, 784-796, doi:10.1002/ijc.29464 (2015).
- 44 Dias, P. *et al.* Evaluation of desmin as a diagnostic and prognostic marker of childhood rhabdomyosarcomas and embryonal sarcomas. *British journal of cancer* **56**, 361-365, doi:10.1038/bjc.1987.203 (1987).
- 45 Bernard, V. *et al.* Single-Cell Transcriptomics of Pancreatic Cancer Precursors Demonstrates Epithelial and Microenvironmental Heterogeneity as an Early Event in Neoplastic Progression. *Clinical cancer research : an official journal of the American Association for Cancer Research* **25**, 2194-2205, doi:10.1158/1078-0432.CCR-18-1955 (2019).
- 46 Tian, C. *et al.* Proteomic analyses of ECM during pancreatic ductal adenocarcinoma progression reveal different contributions by tumor and stromal cells. *Proceedings of the National Academy of Sciences of the United States of America*, doi:10.1073/pnas.1908626116 (2019).
- 47 Zhang, K. *et al.* The collagen receptor discoidin domain receptor 2 stabilizes SNAIL1 to facilitate breast cancer metastasis. *Nature cell biology* **15**, 677-687, doi:10.1038/ncb2743 (2013).
- 48 Corsa, C. A. *et al.* The Action of Discoidin Domain Receptor 2 in Basal Tumor Cells and Stromal Cancer-Associated Fibroblasts Is Critical for Breast Cancer Metastasis. *Cell reports* **15**, 2510-2523, doi:10.1016/j.celrep.2016.05.033 (2016).
- 49 Levental, K. R. *et al.* Matrix crosslinking forces tumor progression by enhancing integrin signaling. *Cell* **139**, 891-906, doi:10.1016/j.cell.2009.10.027 (2009).



50 Torres, S. *et al.* LOXL2 Is Highly Expressed in Cancer-Associated Fibroblasts and Associates to Poor Colon  
Cancer Survival. *Clinical cancer research : an official journal of the American Association for Cancer  
Research* **21**, 4892-4902, doi:10.1158/1078-0432.CCR-14-3096 (2015).

51 Mok, S. C. *et al.* A gene signature predictive for outcome in advanced ovarian cancer identifies a survival  
factor: microfibril-associated glycoprotein 2. *Cancer cell* **16**, 521-532, doi:10.1016/j.ccr.2009.10.018 (2009).

52 Leung, C. S. *et al.* Calcium-dependent FAK/CREB/TNNC1 signalling mediates the effect of stromal MFAP5  
on ovarian cancer metastatic potential. *Nature communications* **5**, 5092, doi:10.1038/ncomms6092 (2014).

53 Neuzillet, C. *et al.* Inter- and intra-tumoural heterogeneity in cancer-associated fibroblasts of human  
pancreatic ductal adenocarcinoma. *The Journal of pathology* **248**, 51-65, doi:10.1002/path.5224 (2019).

54 Vaz, J., Ansari, D., Sasor, A. & Andersson, R. SPARC: A Potential Prognostic and Therapeutic Target in  
Pancreatic Cancer. *Pancreas* **44**, 1024-1035, doi:10.1097/MPA.0000000000000409 (2015).

55 Provenzano, P. P. *et al.* Enzymatic targeting of the stroma ablates physical barriers to treatment of  
pancreatic ductal adenocarcinoma. *Cancer cell* **21**, 418-429, doi:10.1016/j.ccr.2012.01.007 (2012).

56 Dornhofer, N. *et al.* Connective tissue growth factor-specific monoclonal antibody therapy inhibits pancreatic  
tumor growth and metastasis. *Cancer research* **66**, 5816-5827, doi:10.1158/0008-5472.CAN-06-0081  
(2006).

57 Barry-Hamilton, V. *et al.* Allosteric inhibition of lysyl oxidase-like-2 impedes the development of a pathologic  
microenvironment. *Nature medicine* **16**, 1009-1017, doi:10.1038/nm.2208 (2010).

58 Djurec, M. *et al.* Saa3 is a key mediator of the protumorigenic properties of cancer-associated fibroblasts in  
pancreatic tumors. *Proceedings of the National Academy of Sciences of the United States of America* **115**,  
E1147-E1156, doi:10.1073/pnas.1717802115 (2018).

59 Pylayeva-Gupta, Y., Lee, K. E., Hajdu, C. H., Miller, G. & Bar-Sagi, D. Oncogenic Kras-induced GM-CSF  
production promotes the development of pancreatic neoplasia. *Cancer cell* **21**, 836-847,  
doi:10.1016/j.ccr.2012.04.024 (2012).

60 Cortot, A. B. *et al.* Resistance to irreversible EGF receptor tyrosine kinase inhibitors through a multistep  
mechanism involving the IGF1R pathway. *Cancer Res* **73**, 834-843, doi:10.1158/0008-5472.CAN-12-2066  
(2013).

61 Haluska, P. *et al.* Phase I dose-escalation study of MEDI-573, a bispecific, antiligand monoclonal antibody  
against IGF1 and IGFII, in patients with advanced solid tumors. *Clin Cancer Res* **20**, 4747-4757,  
doi:10.1158/1078-0432.CCR-14-0114 (2014).

62 Kakarla, S. *et al.* Antitumor effects of chimeric receptor engineered human T cells directed to tumor stroma.  
*Mol Ther* **21**, 1611-1620, doi:10.1038/mt.2013.110 (2013).

63 Wang, L. C. *et al.* Targeting fibroblast activation protein in tumor stroma with chimeric antigen receptor T  
cells can inhibit tumor growth and augment host immunity without severe toxicity. *Cancer Immunol Res* **2**,  
154-166, doi:10.1158/2326-6066.CIR-13-0027 (2014).

64 Lo, A. *et al.* Tumor-Promoting Desmoplasia Is Disrupted by Depleting FAP-Expressing Stromal Cells.  
*Cancer Res* **75**, 2800-2810, doi:10.1158/0008-5472.CAN-14-3041 (2015).

65 Scott, A. M. *et al.* A Phase I dose-escalation study of sibtuzumab in patients with advanced or metastatic  
fibroblast activation protein-positive cancer. *Clinical cancer research : an official journal of the American  
Association for Cancer Research* **9**, 1639-1647 (2003).

66 Klein, C. *et al.* Novel Tumor-Targeted, Engineered IL-2 Variant (IL2v)-Based Immunocytokines For  
Immunotherapy Of Cancer. *Blood* **122**, 2278-2278, doi:10.1182/blood.V122.21.2278.2278 (2013).

67 Carapuca, E. F. *et al.* Anti-stromal treatment together with chemotherapy targets multiple signalling  
pathways in pancreatic adenocarcinoma. *The Journal of pathology* **239**, 286-296, doi:10.1002/path.4727  
(2016).

68 Froeling, F. E. *et al.* Retinoic acid-induced pancreatic stellate cell quiescence reduces paracrine Wnt-beta-  
catenin signaling to slow tumor progression. *Gastroenterology* **141**, 1486-1497, 1497 e1481-1414,  
doi:10.1053/j.gastro.2011.06.047 (2011).

69 Sherman, M. H. *et al.* Vitamin D receptor-mediated stromal reprogramming suppresses pancreatitis and  
enhances pancreatic cancer therapy. *Cell* **159**, 80-93, doi:10.1016/j.cell.2014.08.007 (2014).

70 Morris, J. C. *et al.* Phase I study of GC1008 (fresolimumab): a human anti-transforming growth factor-beta  
(TGFbeta) monoclonal antibody in patients with advanced malignant melanoma or renal cell carcinoma.  
*PLoS one* **9**, e90353, doi:10.1371/journal.pone.0090353 (2014).

71 Melisi, D. *et al.* Galunisertib plus gemcitabine vs. gemcitabine for first-line treatment of patients with  
unresectable pancreatic cancer. *British journal of cancer* **119**, 1208-1214, doi:10.1038/s41416-018-0246-z  
(2018).

72 Catenacci, D. V. *et al.* Randomized Phase Ib/II Study of Gemcitabine Plus Placebo or Vismodegib, a  
Hedgehog Pathway Inhibitor, in Patients With Metastatic Pancreatic Cancer. *J Clin Oncol* **33**, 4284-4292,  
doi:10.1200/JCO.2015.62.8719 (2015).

73 Mathew, E. *et al.* The transcription factor GLI1 modulates the inflammatory response during pancreatic  
tissue remodeling. *The Journal of biological chemistry* **289**, 27727-27743, doi:10.1074/jbc.M114.556563  
(2014).

- 74 Olive, K. P. *et al.* Inhibition of Hedgehog signaling enhances delivery of chemotherapy in a mouse model of pancreatic cancer. *Science* **324**, 1457-1461, doi:10.1126/science.1171362 (2009).
- 75 Tape, C. J. *et al.* Oncogenic KRAS Regulates Tumor Cell Signaling via Stromal Reciprocation. *Cell* **165**, 1818, doi:10.1016/j.cell.2016.05.079 (2016).
- 76 Bockorny, B. *et al.* BL-8040, a CXCR4 antagonist, in combination with pembrolizumab and chemotherapy for pancreatic cancer: the COMBAT trial. *Nature medicine* **26**, 878-885, doi:10.1038/s41591-020-0880-x (2020).
- 77 Konstantinidou, G. *et al.* RHOA-FAK is a required signaling axis for the maintenance of KRAS-driven lung adenocarcinomas. *Cancer Discov* **3**, 444-457, doi:10.1158/2159-8290.CD-12-0388 (2013).
- 78 Bahleda, R. *et al.* Multicenter Phase I Study of Erdafitinib (JNJ-42756493), Oral Pan-Fibroblast Growth Factor Receptor Inhibitor, in Patients with Advanced or Refractory Solid Tumors. *Clin Cancer Res* **25**, 4888-4897, doi:10.1158/1078-0432.CCR-18-3334 (2019).
- 79 Perera, T. P. S. *et al.* Discovery and Pharmacological Characterization of JNJ-42756493 (Erdafitinib), a Functionally Selective Small-Molecule FGFR Family Inhibitor. *Mol Cancer Ther* **16**, 1010-1020, doi:10.1158/1535-7163.MCT-16-0589 (2017).
- 80 Pal, S. K. *et al.* Efficacy of BGJ398, a Fibroblast Growth Factor Receptor 1-3 Inhibitor, in Patients with Previously Treated Advanced Urothelial Carcinoma with FGFR3 Alterations. *Cancer Discov* **8**, 812-821, doi:10.1158/2159-8290.CD-18-0229 (2018).
- 81 Yap, T. A. *et al.* AT13148 is a novel, oral multi-AGC kinase inhibitor with potent pharmacodynamic and antitumor activity. *Clinical cancer research : an official journal of the American Association for Cancer Research* **18**, 3912-3923, doi:10.1158/1078-0432.CCR-11-3313 (2012).
- 82 Pietras, K., Pahler, J., Bergers, G. & Hanahan, D. Functions of paracrine PDGF signaling in the proangiogenic tumor stroma revealed by pharmacological targeting. *PLoS Med* **5**, e19, doi:10.1371/journal.pmed.0050019 (2008).
- 83 Haubeiss, S. *et al.* Dasatinib reverses cancer-associated fibroblasts (CAFs) from primary lung carcinomas to a phenotype comparable to that of normal fibroblasts. *Mol Cancer* **9**, 168, doi:10.1186/1476-4598-9-168 (2010).
- 84 Johnson, D. E., O'Keefe, R. A. & Grandis, J. R. Targeting the IL-6/JAK/STAT3 signalling axis in cancer. *Nat Rev Clin Oncol* **15**, 234-248, doi:10.1038/nrclinonc.2018.8 (2018).
- 85 Hong, D. *et al.* AZD9150, a next-generation antisense oligonucleotide inhibitor of STAT3 with early evidence of clinical activity in lymphoma and lung cancer. *Sci Transl Med* **7**, 314ra185, doi:10.1126/scitranslmed.aac5272 (2015).
- 86 Shah, M. A. *et al.* Andecaliximab/GS-5745 Alone and Combined with mFOLFOX6 in Advanced Gastric and Gastroesophageal Junction Adenocarcinoma: Results from a Phase I Study. *Clin Cancer Res* **24**, 3829-3837, doi:10.1158/1078-0432.CCR-17-2469 (2018).
- 87 Chiappori, A. A. *et al.* A phase I pharmacokinetic and pharmacodynamic study of s-3304, a novel matrix metalloproteinase inhibitor, in patients with advanced and refractory solid tumors. *Clinical cancer research : an official journal of the American Association for Cancer Research* **13**, 2091-2099, doi:10.1158/1078-0432.CCR-06-1586 (2007).
- 88 Reardon, D. A. *et al.* Salvage radioimmunotherapy with murine iodine-131-labeled antitenascin monoclonal antibody 81C6 for patients with recurrent primary and metastatic malignant brain tumors: phase II study results. *J Clin Oncol* **24**, 115-122, doi:10.1200/JCO.2005.03.4082 (2006).
